# Supplementary material for: Fabrication and Preliminary Evaluation of Porous Electroactive Polyvinyl Alcohol/Sodium Alginate-Based Nanocomposite Scaffolds for Cardiac Tissue Engineering
Source: Research Square preprint supplement (doi:10.21203/rs.3.rs-7554607/v1), 2025-10-03
Supplement: Supplementary file 1 [file d1c54d9cef5f34c56a68726d.docx]

**Supplementary Materials**

**Fabrication and Preliminary Evaluation of Porous Electroactive Polyvinyl Alcohol/Sodium Alginate-Based Nanocomposite Scaffolds for Cardiac Tissue Engineering**

**Asmaa A. Ali**a**, Tarek Fahmy**a**, Afaf Sarhan**a,#**, Ibrahim M. El-Sherbiny**b,*

a Polymer Laboratory, Physics Department, Faculty of Science, Mansoura University, 35516 Mansoura, Egypt, b Nanomedicine Research Laboratories, Center for Materials Science, Zewail City of Science and Technology, 6 October City, 12578, Giza, Egypt

**Corresponding author: Ibrahim M. El-Sherbiny,* [ielsherbiny@zewailcity.edu.eg](mailto:ielsherbiny@zewailcity.edu.eg)

**Materials**

Silver nitrate of 99.9% purity was purchased from Merck (Germany). Copper chloride dihydrate, calcium chloride, sodium hydroxide, and sodium borohydride were supplied by Sigma–Aldrich (St. Louis, USA). Graphite powder was acquired from ACROS (USA). Sodium nitrate, hydrogen peroxide, and potassium permanganate were purchased from Neolab Life Science. Aniline (98 %, monomer) was obtained from Merck (Germany). Ammonium peroxydisulfate (APS) was obtained from Euclid (Cleveland, USA). Sulfuric acid and chloroform were of analytical grade and used as received.

***Synthesis of silver nanoparticles***

Silver nanoparticles (Ag-NPs) were synthesized using sodium borohydride as a reducing agent according to the method reported elsewhere [[1](#_ENREF_1)]. Firstly, 50 mL of 10 mM aqueous solution of AgNO3 was prepared. Afterwards, the AgNO3 solution was added drop by drop to a precooled 150 mL of 20 mM sodium borohydride under continuous stirring. The reaction took place in an ice bath to sluggish the reaction and thus evading secondary reactions. The yellowish color of the reaction mixture darkened upon the addition of AgNO3 solution until reaching a dark, gray-colored mixture after the complete consumption of the AgNO3 solution. The reaction mixture was left unagitated for 6-8 hours to precipitate the silver nano particles. Then, the precipitate was centrifuged, and the obtained product was washed several times. Finally, the product was dried in an oven at 70 °C for to expel moisture.

***Synthesis of polyaniline nanofiber***

Template-free polyaniline nanofiber (PANI-NFs) have been synthesized via employing interfacial polymerization as reported elsewhere [[2](#_ENREF_2), [3](#_ENREF_3)]. In a typical procedure, 3.2×10-4 mol of aniline monomer was dissolved in 10 mL of chloroform to form the organic phase. To construct the aqueous phase, 8×10-4 mol of the initiator (ammonium peroxydisulfate) was added to 10 mL of 1 M HCl and stirred until completely dissolved. Subsequently, the two solutions were gently transferred to a larger beaker to form a biphasic system with an interface between their boundaries. After a short time, the green PANI begins to appear at the interface, indicating the beginning of polymerization. The polymerization took place at room temperature for 24 hours (overnight). Afterwards, the product is collected and purified through repeated washing and filtration. Finally, the produced PANI powder was dried in an electrical oven at 50 °C.

***Synthesis of copper oxide nanoleaves***

Copper oxide nanoleaves (CuO-NLs)were fabricated utilizing a modified chemical precipitation method [[4](#_ENREF_4)]. Typically, 0.5 g of CuCl2 dihydrate powder was dissolved in 100 mL of deionized water at 60 °C and pH = 4. An alkaline solution was prepared by dissolving 1 g of sodium hydroxide (NaOH) pellets in 10 mL of deionized water, and then the solution was added dropwise under stirring. After one hour, a black precipitate of copper hydroxide appears indicating the finalization of the reaction. Thereafter, the obtained precipitate was filtered and washed several times with deionized water to get rid of all residual salt and dried at about 90 °C overnight. Eventually, the dried product was calcinated at 400 °C.

***Synthesis of graphene oxide nanosheets***

Graphene oxide nanosheets (GO-NSs) were synthesized by employing Hummer’s method [[5](#_ENREF_5), [6](#_ENREF_6)] with a slight modification. Typically, 6 g of graphite powder was added to 138 mL of sulfuric acid (98%) and 3 g of sodium nitrate under continuous stirring in an ice bath. Then, 18 g of potassium permanganate was added slowly and carefully to the previous mixture while keeping the temperature of the suspension lower than 20 °C. The reaction mixture was then left under vigorous stirring for two hours. The temperature of the reaction mixture was left to increase up to 35°C. Carefully, 280 mL of deionized water was added to the reaction mixture due to its exothermic nature and left in air for one hour for cooling. At that point 500 mL of water and 20 mL of hydrogen peroxide were added to terminate the reaction. Finally, the resulting suspension stirred overnight and then filtered using filter paper. For purification, the resulting product was dispersed in 10% HCl until no gas evolved and then dialyzed using a 3.5 kDa dialysis membrane for one week by changing the water three times per day. The final product was lyophilized and 5he collected powder was stored for subsequent use.

**Figure S1.** Histograms of cell diameter distribution of the pristine blend foam as well as the conductive nanocomposite foams.

**Figure S2.** I-V characteristics of conductive NCFs as well as neat blend foam under different applied loads.

| **Sample** | **Load**  **Kg** | **Slope)** |  |  | **(S/cm)** |
| --- | --- | --- | --- | --- | --- |
| **Blend Foam** | **0** | 7.9 x10-4 | 4.4x10-4 | 8.9 x10-4 | 2.66 x10-3 |
|  | **1** | 9.6 x10-4 | 2.36x10-3 |
|  | **2** | 0.00102 | 2.45 x10-3 |
|  | **3** | 0.00156 | 2.44 x10-3 |
| **Ag/NCF** | **0** | 2.8x10-4 | 4.5x10-4 | 9.1x10-4 | 9.64x10-4 |
|  | **1** | 3.7x10-4 | 9.36x10-4 |
|  | **2** | 1.9x10-4 | 9.88x10-4 |
|  | **3** | 2.27x10-4 | 9.6x10-4 |
| **PANI/NCF** | **0** | 0.00126 | 7.5x10-4 | 0.00149 | 1.01 x10-3 |
|  | **1** | 0.00108 | 1.08 x10-3 |
|  | **2** | 0.00114 | 1.43 x10-3 |
|  | **3** | 8.9x10-4 | 1.07 x10-3 |
| **CuO/NCF** | **0** | 0.00136 | 6.2x10-4 | 0.00125 | 1.23x10-3 |
|  | **1** | 0.00109 | 1.39x10-3 |
|  | **2** | 9.6x10-4 | 1.54x10-3 |
|  | **3** | 5.7x10-4 | 1.56x10-3 |
| **GO/NCF** | **0** | 0.00125 | 5.2x10-4 | 0.00105 | 2.9x10-3 |
|  | **1** | 0.0015 | 2.87x10-3 |
|  | **2** | 0.002 | 3.14x10-3 |
|  | **3** | 0.0014 | 3.15x10-3 |

**Table S1.** Theoretical and experimental values of and conductivities of pristine blend foam and conductive NCFs under different applied loads.
